# Supplementary material for: Highly enhanced toughness of interpenetrating network hydrogel by incorporating poly(ethylene glycol) in first network
Source: Royal Society of Chemistry journal article supplement (doi:10.1039/c4ra11494a), 2014-11-24
Supplement: c4ra11494a1.pdf [file c4ra11494a1.pdf]

## Supporting Information

### **Highly Enhanced Toughness of Interpenetrating Network Hydrogel by Incorporating Poly (ethylene glycol) in First Network**

Luyi Wang, Guorong Shan\*, Pengju Pan

State Key Laboratory of Chemical Engineering, Department of Chemical and  
Biological Engineering, Zhejiang University, 38 Zheda Road, Hangzhou 310027,  
China

\*Corresponding Author

Tel.: +86-571-87951334; e-mail: [shangr@zju.edu.cn](mailto:shangr@zju.edu.cn)

---

## 1. Calculation of PEG content in IPN hydrogels

PEG contents ( $C_{\text{PEG}}$ ) in PAMPS-PEG/PAM IPN hydrogels were calculated as follows:

$$C_{\text{PEG}} = \frac{m_{\text{PEG}}}{m_0} = \frac{m_{\text{dry}} - m_{\text{PAMPS}} - m_{\text{PAM}}}{m_0} \quad (\text{eq. S1})$$

where  $m_{\text{PEG}}$ ,  $m_{\text{PAMPS}}$ , and  $m_{\text{PAM}}$  are the weights of PEG, PAMPS, and PAM in IPN hydrogel.  $m_0$  and  $m_{\text{dry}}$  are the weights of swollen and freeze-dried hydrogels. Assuming that all the AMPS monomers are polymerized in synthesis of the first network,  $m_{\text{PAMPS}}$  can be calculated from the PAMPS content in used SN hydrogel. To calculate  $m_{\text{PAM}}$ , concentration of AM monomer ( $C_{\text{AM}}$ ) in the residual precursor solution of the second network was titrated.<sup>1</sup> It was found that the concentration of AM monomer was unchanged and kept at 2.0 mol/L after some of AM solution was swelled into the first network. Therefore,  $m_{\text{PAM}}$  can be calculated as:

$$m_{\text{PAM}} = \Delta V \times 2.0 \times 71.0 \quad (\text{eq. S2})$$

where  $\Delta V$  is the volume increment of hydrogel during swelling in AM or AM/PEG solution.

PEG contents ( $C_{\text{PEG}}$ ) in PAMPS/PAM-PEG IPN hydrogels were calculated as follows:

$$C_{\text{PEG}} = \frac{m_{\text{P1}}}{m_0} = \frac{m_{\text{PEG}} - m_{\text{P2}}}{m_0} \quad (\text{eq. S3})$$

where  $m_{\text{PEG}}$ ,  $m_{\text{P1}}$  and  $m_{\text{P2}}$  are the weights of PEG added in the precursor solution of the second network, PEG in hydrogel and PEG in the residual precursor solution.  $m_0$  is the weight of swollen hydrogel.  $m_{\text{P2}}$  could be measured as follows. First, PEG in the

---

residual precursor solution was extracted by adding dichloromethane; Second, PEG was precipitated by pouring extraction liquid into a large amount of diethyl ether,<sup>2</sup> then PEG was dried and weighed. As acrylamide dissolves in diethyl ether, it could not be precipitated and would not influence the measurement of  $m_{P2}$ .

---

## 2. Calculation of mesh size of the first network in IPN hydrogels

The average mesh size of the first network was approximately calculated basing on the cross-linking density. Assuming that MBAM of the first network were totally reacted and averagely distributed in the first network, the mesh size of the first network ( $\xi$ ) could be approximately calculated as follows:

$$\xi = (V_{\text{mesh}})^{1/3} = \left( \frac{V_{\text{gel}}}{N_{\text{cross-linker}}} \right)^{1/3} = \left( \frac{1.23 * 10^{-4} (\text{m}^3)}{4 * 10^{-4} * N_A} \right)^{1/3} = 7.91 * 10^{-9} \text{ m} \quad (\text{eq. S4})$$

where  $V_{\text{mesh}}$  is the average mesh volume of the first network,  $V_{\text{gel}}$  is the volume of IPN hydrogel, and  $N_{\text{cross-linker}}$  is the amount of cross-linker of the first network.

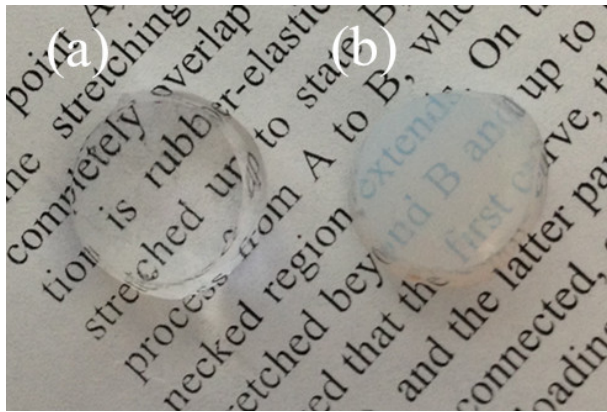

**Figure S1.** Images of (a) PAMPS/PAM and (b) PAMPS/PAM-PEG-5 IPN hydrogels. PAMPS/PAM-PEG-5 IPN hydrogel is turbid, while PAMPS/PAM IPN hydrogel is transparent.

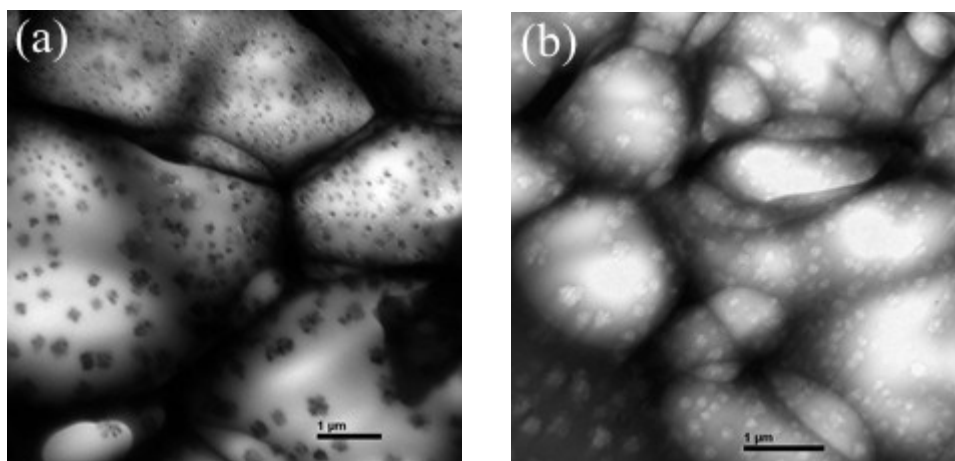

**Figure S2.** TEM micographs of PAMPS/PAM (a) and PAMPS-PEG-0.8/PAM (b) IPN hydrogels.

## References

- (1) T. Lü and G. Shan, *J. Appl. Polym. Sci.*, 2009, **112**, 2859-2867.
- (2) S. So, L. G. Peeva, E. W. Tate, R. J. Leatherbarrow and A. G. Livingston, *Chem. Commun.*, 2010, **46**, 2808-2810.
